# Supplementary material
Source: publisher site journal article supplement (https://www.dovepress.com/article/245557)

**Supplementary 1.** NEAT1 overexpression promotes GES-1 cell proliferation

**Notes:** (A) NEAT1 expression in GES-1 cells with pNEAT1 and pcNDA3.1 transfection. (B) Cell proliferation rate in GES-1 cells with pNEAT1 and pcNDA3.1 transfection. ***P<0.001; **P<0.01.

**Abbreviations**: NEAT1: nuclear paraspeckle assembly transcript 1.


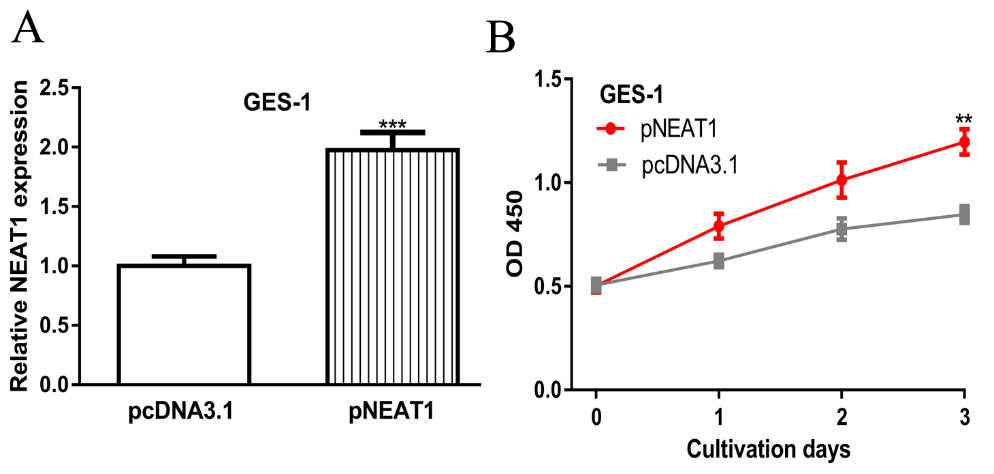

Supplement: Supplementary file 1 [file get_supplementary_file.php]
